# Supplementary material for: Single-cell immune signature for detecting early-stage HCC and early assessing anti-PD-1 immunotherapy efficacy
Source: HighWire-hosted journal article supplement (doi:10.1136/jitc-2021-003133), 2022-01-01
Supplement: jitc-2021-003133supp004_data_supplement.xlsx [file jitc-2021-003133supp004_data_supplement.xlsx]

## Sheet: sheet
Supplementary Table 4. Clinical characteristics of BCLC-A HCC patients with high and low naïve CD4 T levels
Characteristics	Frequency of naïve CD4 (in T cells) > 20%	Frequency of naïve CD4 (in T cells) < 20%	P value
Sample size	8	20
Age (years)	60.88±10.41	57.44±10.72	0.455
Gender
Female	1 (12.5%)	5 (25%)	0.6399
Male	7 (87.5%)	15 (75%)
Cirrhosis
No	3 (37.5%)	13 (65%)	0.231
Yes	5 (62.5%)	7 (35%)
HBV
Infected	4 (50%)	17 (85%)	0.142
Uninfected	4 (50%)	3 (15%)
Cirrhosis & HBV
Cirrhosis-/HBV-	3 (37.5%)	2 (10%)	0.267
Cirrhosis+/HBV+	4 (50%)	6 (30%)
Cirrhosis-/HBV+	0 (0%)	11 (55%)
Cirrhosis+/HBV-	1 (12.5%)	1 (5%)
