# Supplementary material for: Single-cell immune signature for detecting early-stage HCC and early assessing anti-PD-1 immunotherapy efficacy
Source: HighWire-hosted journal article supplement (doi:10.1136/jitc-2021-003133), 2022-01-01
Supplement: jitc-2021-003133supp012_data_supplement.pdf [file jitc-2021-003133supp012_data_supplement.pdf]

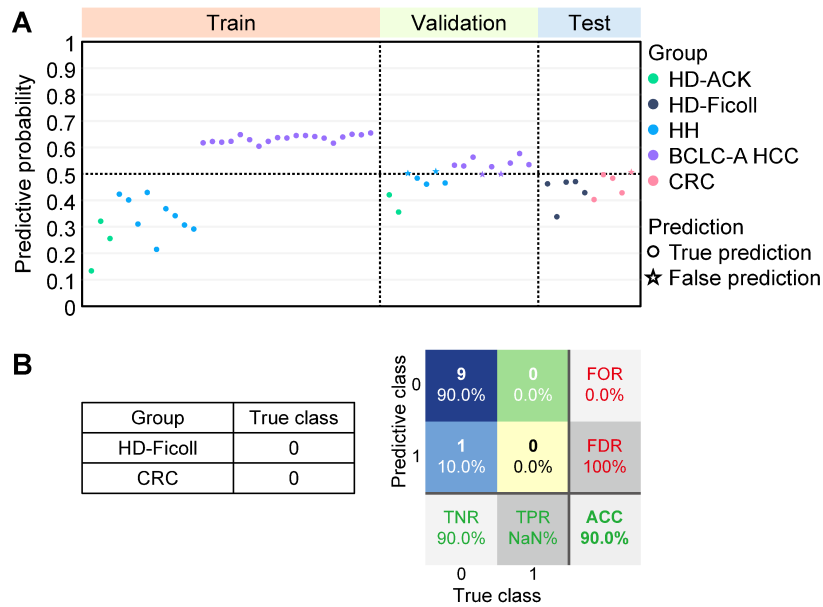

**Supplementary Figure 8. Classification result of AdaBoost-SVM classifier in HD, HH, CRC, and BCLC-A HCC groups.**
