# Supplementary material for: Single-cell immune signature for detecting early-stage HCC and early assessing anti-PD-1 immunotherapy efficacy
Source: PubMed Central journal article supplement — J Immunother Cancer. 2022 Jan 31;10(1):e003133. doi: 10.1136/jitc-2021-003133 (PMC8804705; doi:10.1136/jitc-2021-003133), 2022-01-31
Supplement: jitc-2021-003133supp013.pdf [file jitc-2021-003133supp013.pdf]

**Patient ID: N5**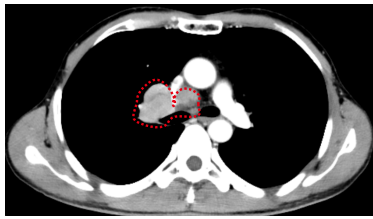

Baseline

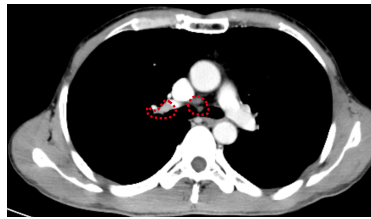Scanning during anti PD-1 immunotherapy  
(114 days after baseline)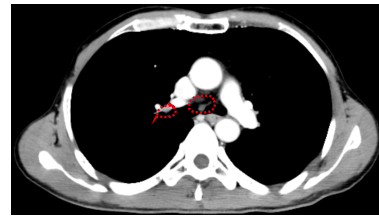Final efficacy evaluation  
(344 days after baseline)**Patient ID: C1**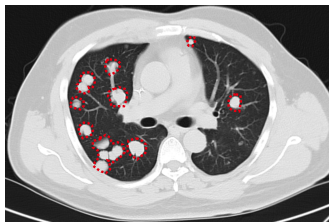

Baseline

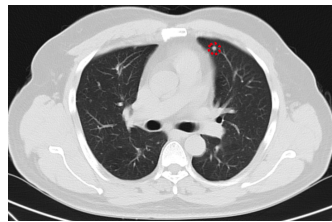Scanning during anti PD-1 immunotherapy  
(111 days after baseline)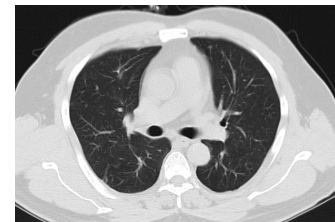Final efficacy evaluation  
(373 days after baseline)**Patient ID: N2**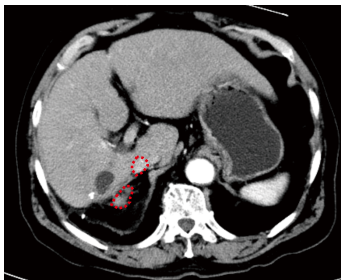

Baseline

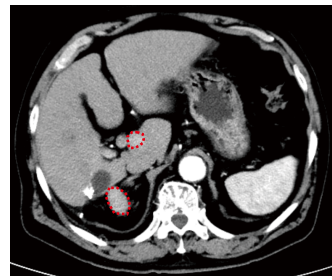Scanning during anti PD-1 immunotherapy  
(134 days after baseline)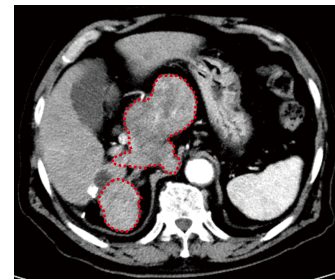Final efficacy evaluation  
(504 days after baseline)**Patient ID: C3**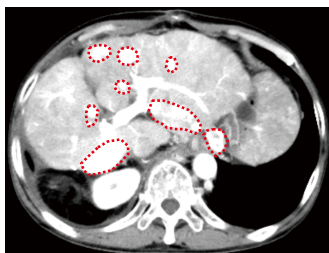

Baseline

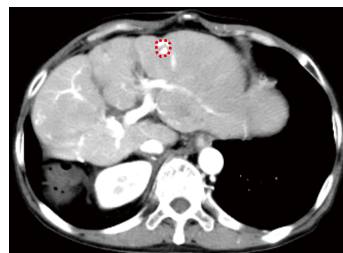Scanning during anti PD-1 immunotherapy  
(106 days after baseline)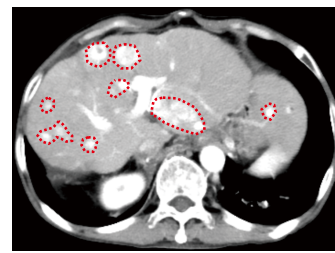Final efficacy evaluation  
(186 days after baseline)**Supplementary Figure 9. Computed tomographic scannings of lesions of the DCB and NDB patients before and after anti-PD-1 monotherapy.**
