# Supplementary material for: Single-cell immune signature for detecting early-stage HCC and early assessing anti-PD-1 immunotherapy efficacy
Source: HighWire-hosted journal article supplement (doi:10.1136/jitc-2021-003133), 2022-01-01
Supplement: jitc-2021-003133supp015_data_supplement.pdf [file jitc-2021-003133supp015_data_supplement.pdf]

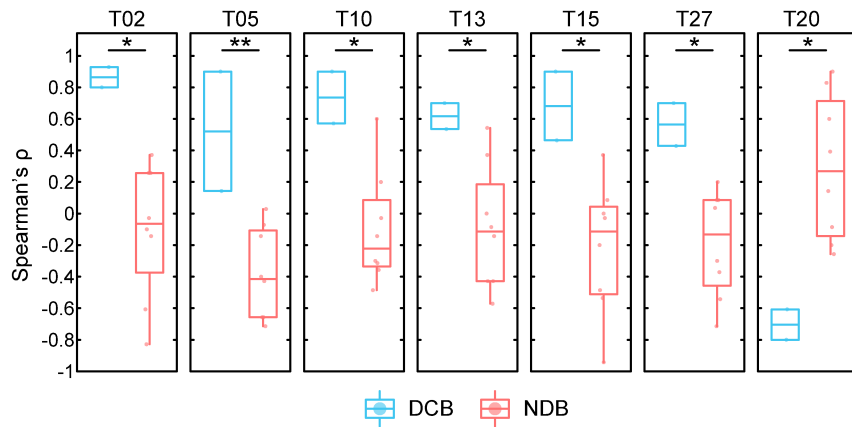

**Supplementary Figure 11. Comparisons of the Spearman correlation coefficients between the relative changes and treatment cycles of identified cell clusters across DCB and NDB patient groups.**
