# Supplementary figures and images for: Single-cell immune signature for detecting early-stage HCC and early assessing anti-PD-1 immunotherapy efficacy
Source: HighWire-hosted journal article supplement (doi:10.1136/jitc-2021-003133), 2022-01-01

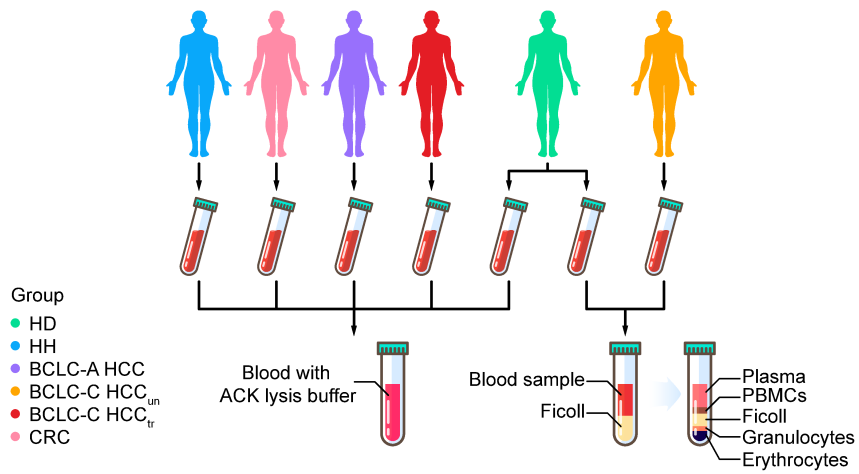

**Supplementary Figure 1. Schematic diagram of PBMC samples enrolled in this study.**

Supplement: jitc-2021-003133supp005_data_supplement.pdf [file jitc-2021-003133supp005_data_supplement.pdf]

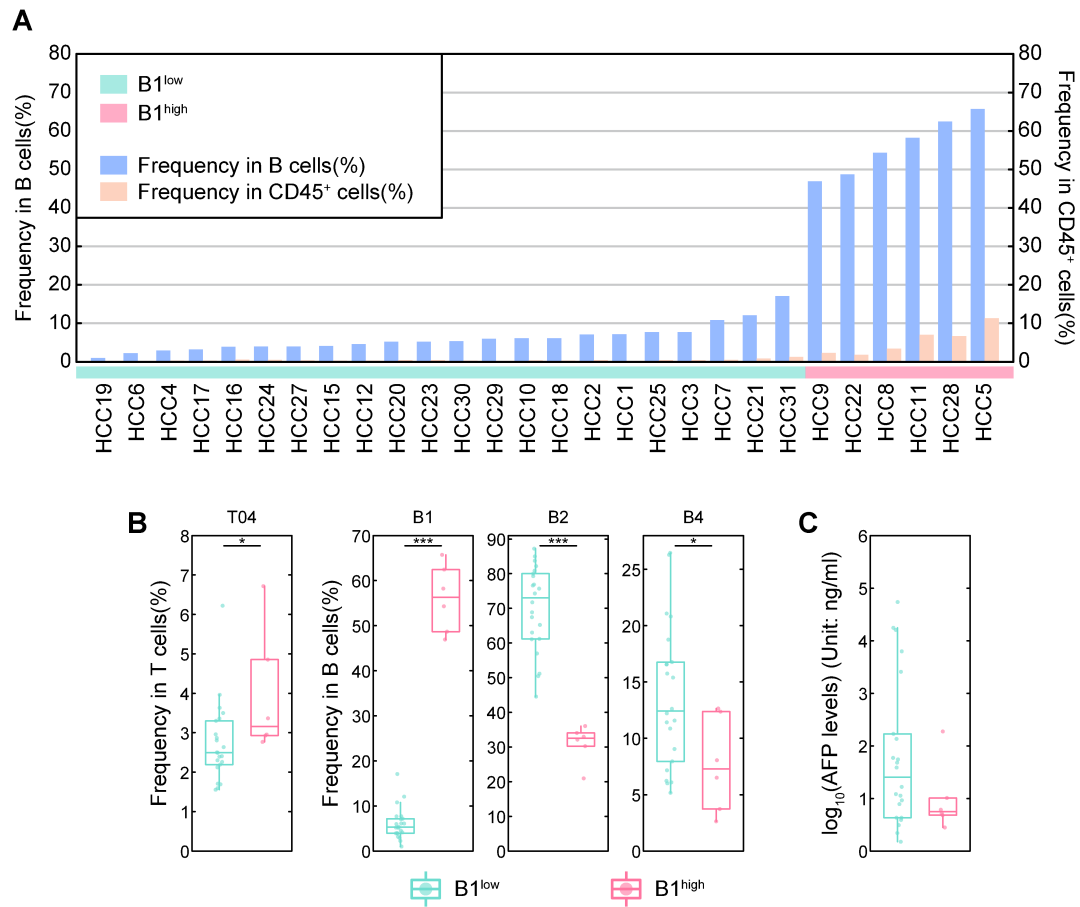

Supplementary Figure 3. Comparisons of BCLC-A HCC patients with high and low B1 levels.

Supplement: jitc-2021-003133supp007_data_supplement.pdf [file jitc-2021-003133supp007_data_supplement.pdf]

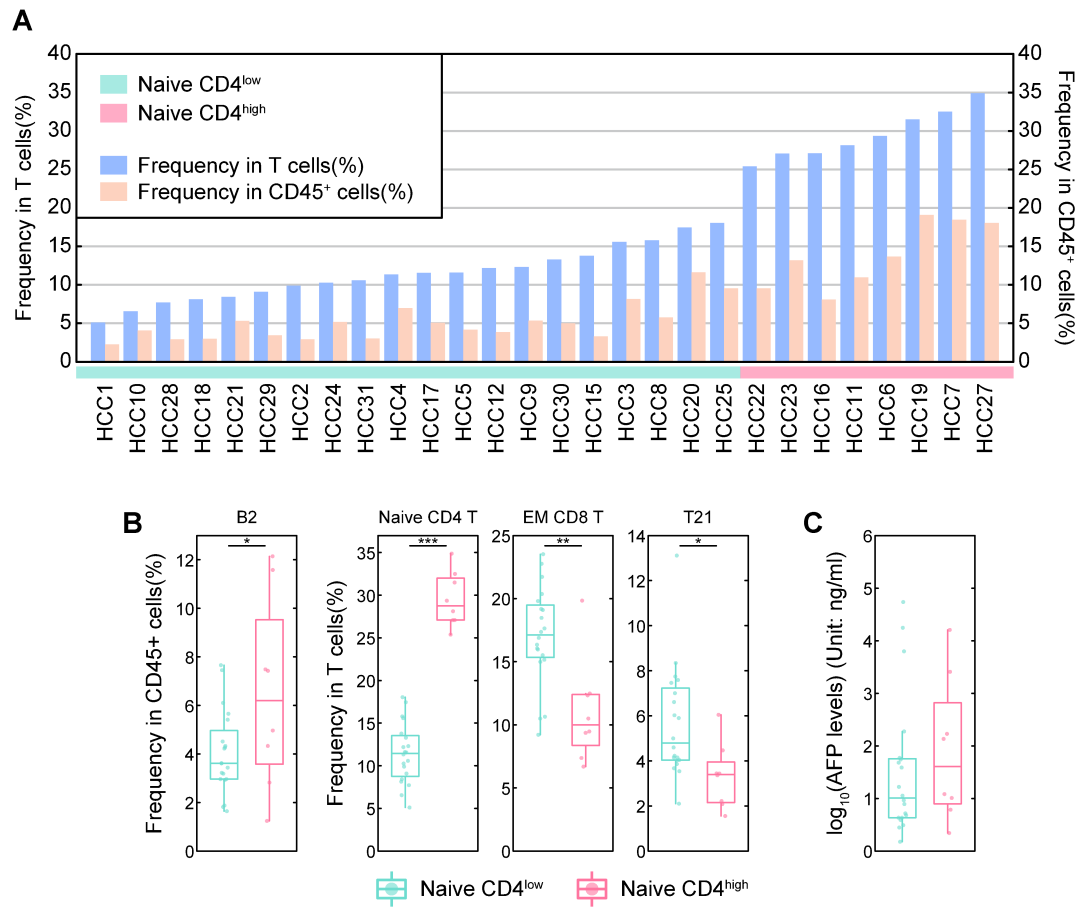

**Supplementary Figure 4. Comparisons of BCLC-A HCC patients with high and low naïve CD4 T levels.**

Supplement: jitc-2021-003133supp008_data_supplement.pdf [file jitc-2021-003133supp008_data_supplement.pdf]

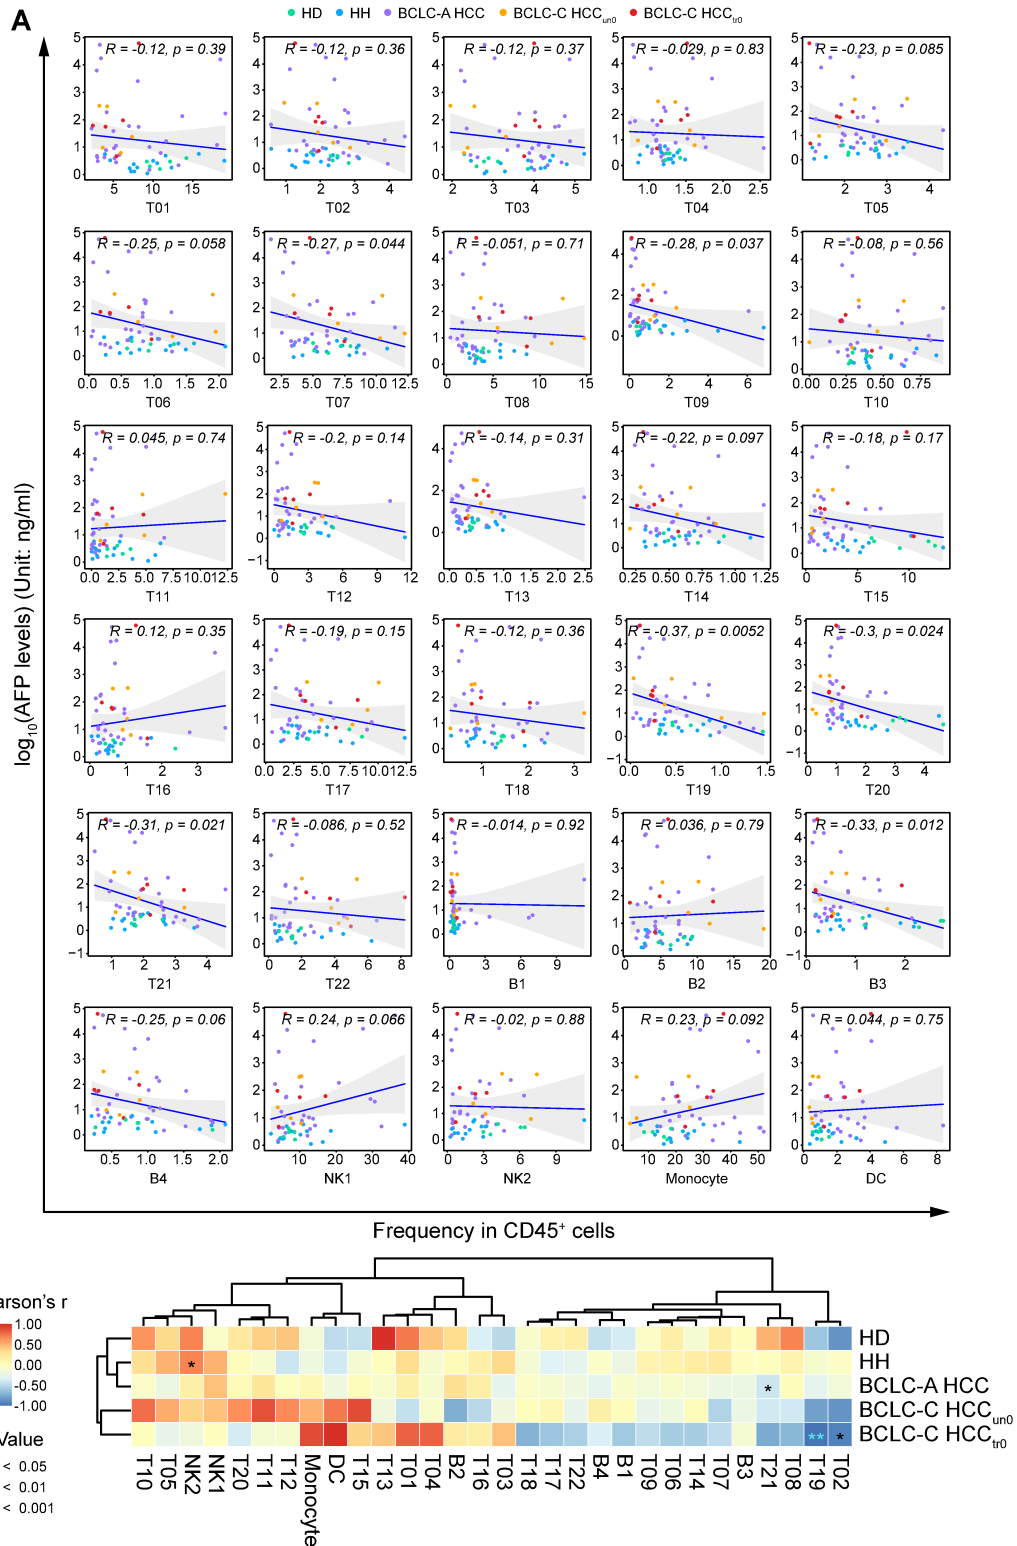

Supplement: jitc-2021-003133supp010_data_supplement.pdf [file jitc-2021-003133supp010_data_supplement.pdf]
