# Supplementary figures and images for: Single-cell immune signature for detecting early-stage HCC and early assessing anti-PD-1 immunotherapy efficacy
Source: PubMed Central journal article supplement — J Immunother Cancer. 2022 Jan 31;10(1):e003133. doi: 10.1136/jitc-2021-003133 (PMC8804705; doi:10.1136/jitc-2021-003133), 2022-01-31

**A**

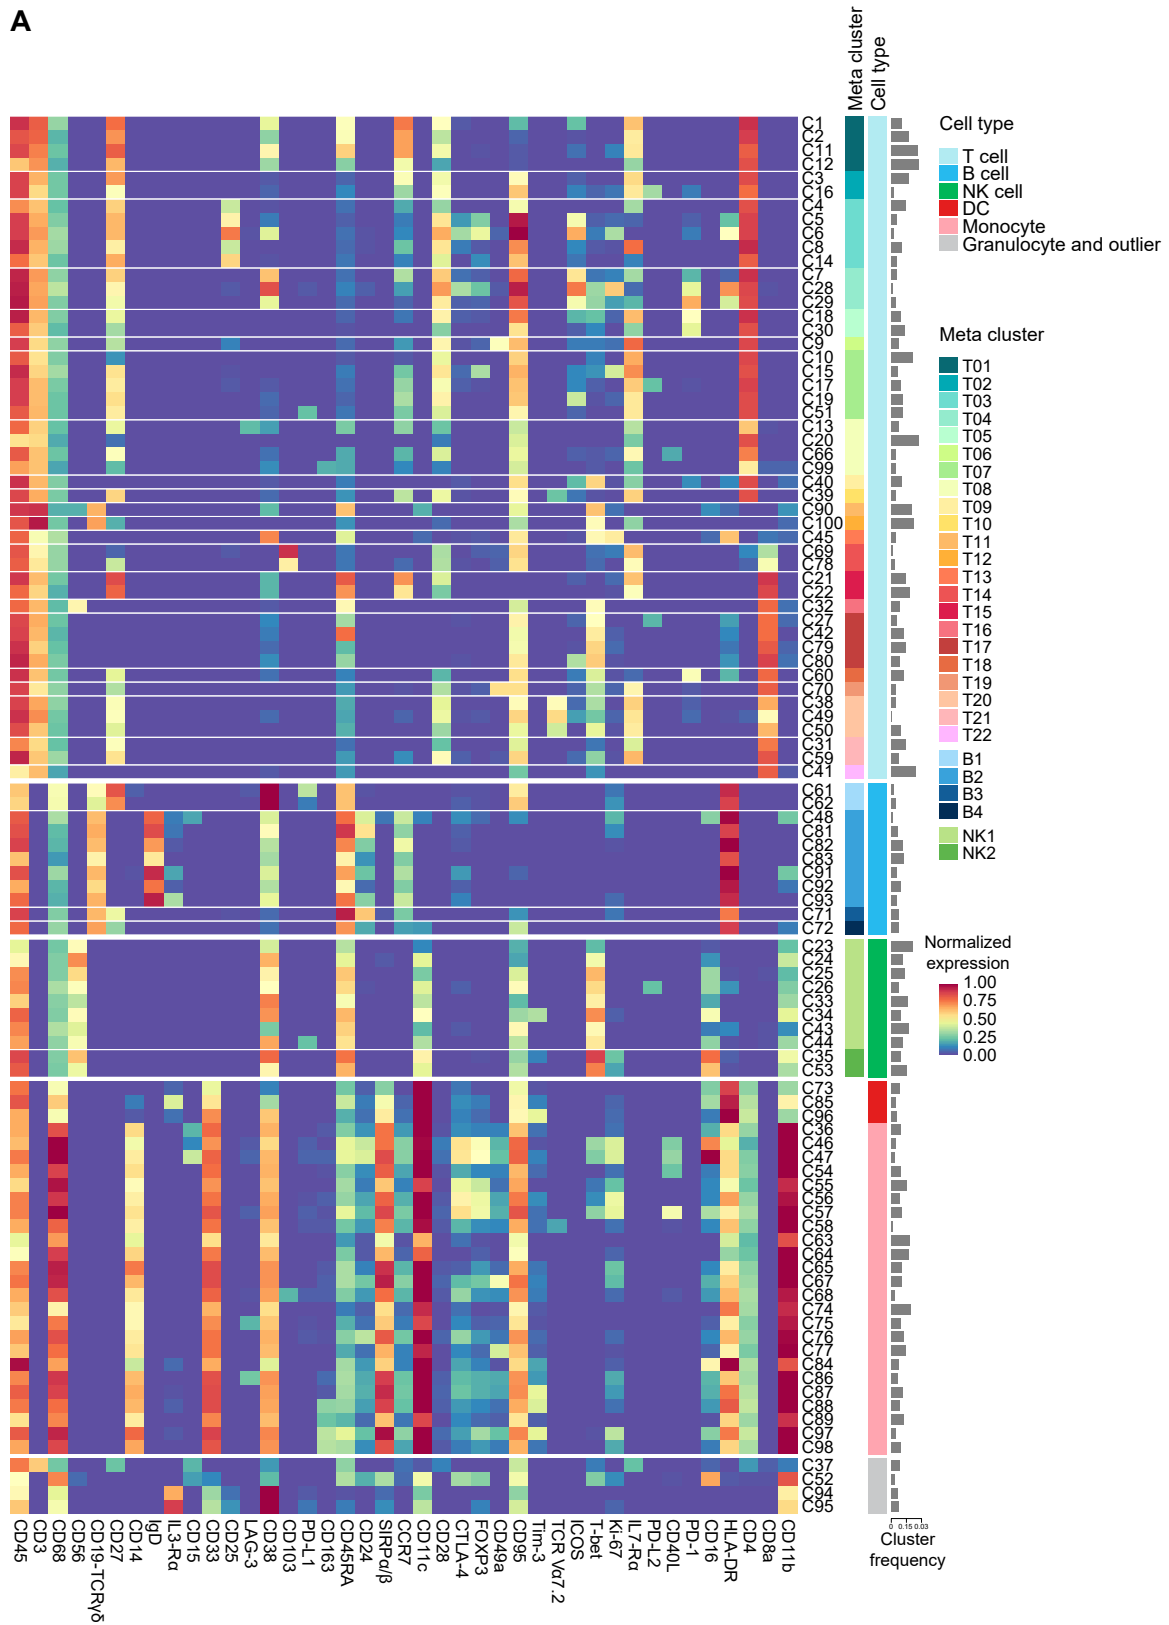

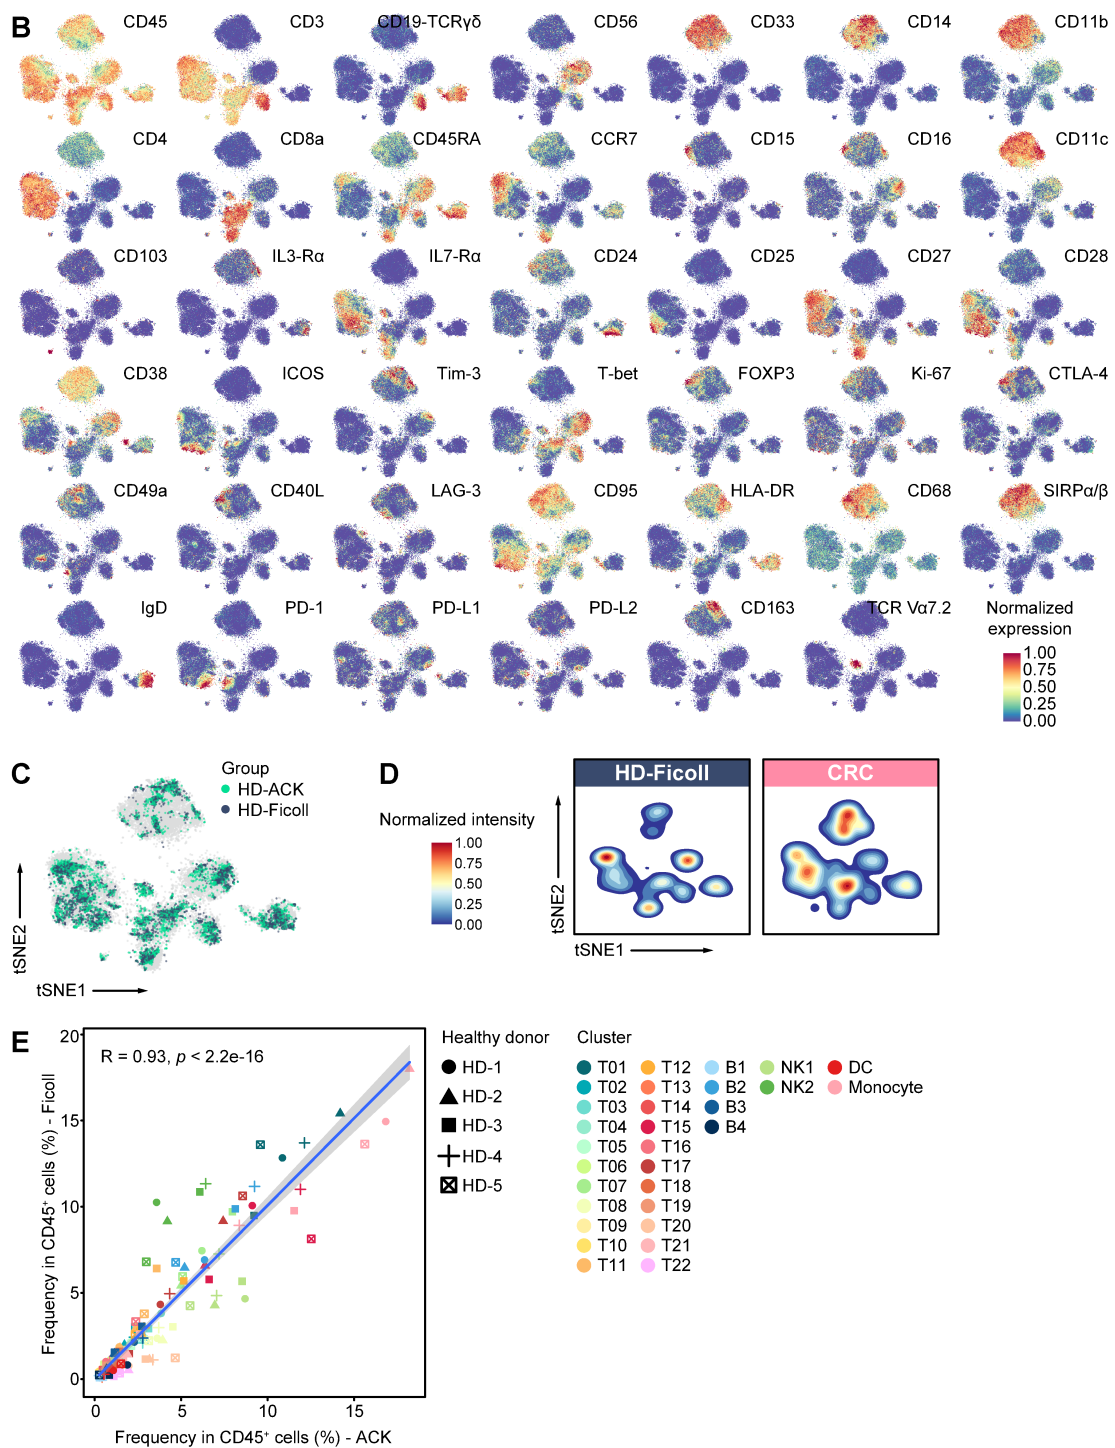

Supplementary Figure 2. Single-cell CyTOF analysis of HD, HH, CRC, and HCC groups.

Supplement: jitc-2021-003133supp006.pdf [file jitc-2021-003133supp006.pdf]

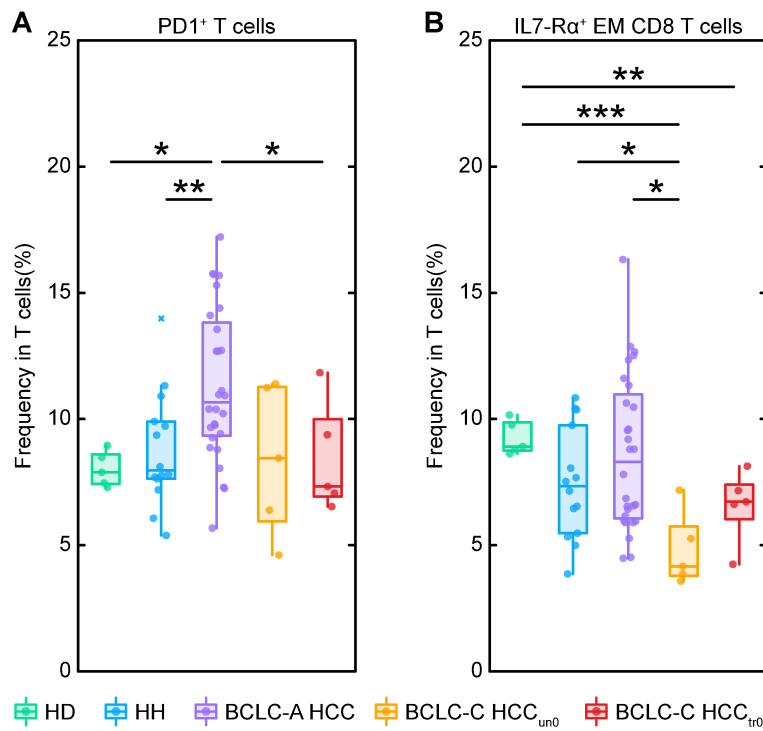

**Supplementary Figure 5. Comparisons of selected immune subsets across HD, HH, and HCC groups.**

Supplement: jitc-2021-003133supp009.pdf [file jitc-2021-003133supp009.pdf]

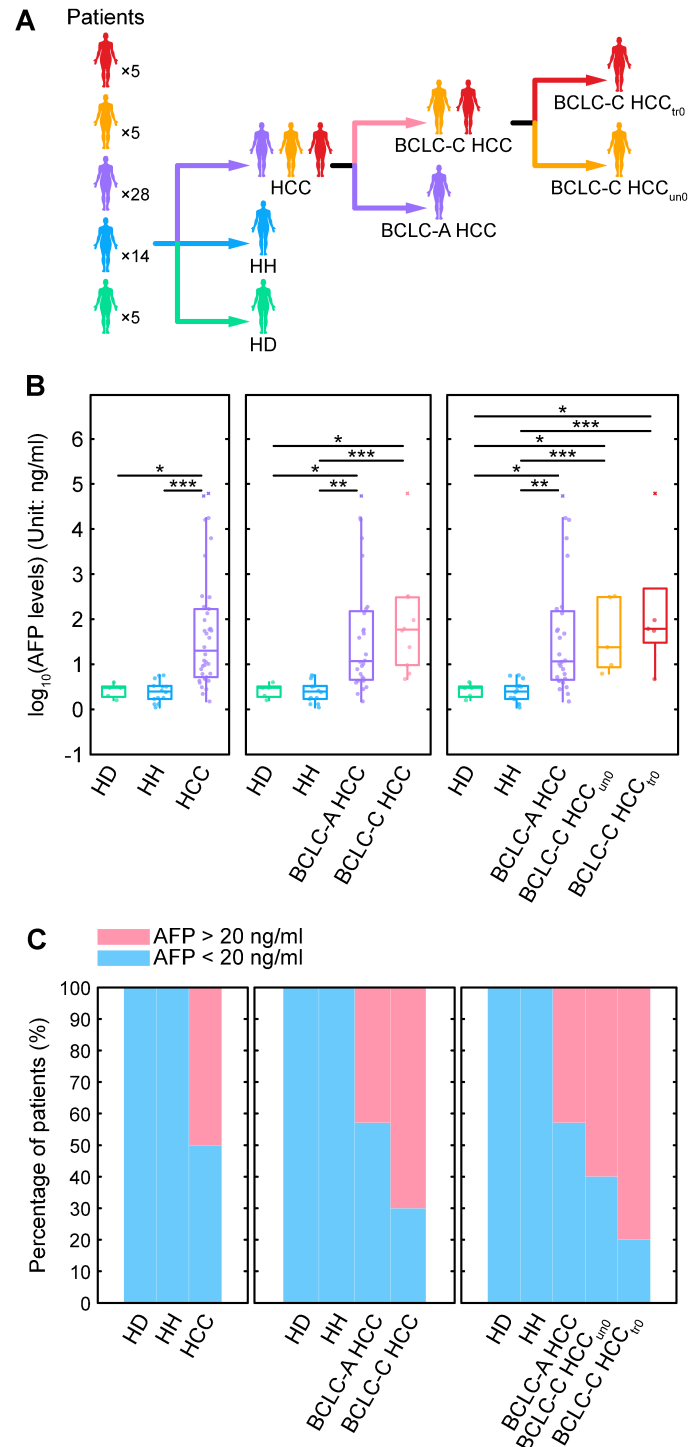

**Supplementary Figure 7. Comparisons of AFP levels among HD, HH, and HCC groups.**

Supplement: jitc-2021-003133supp011.pdf [file jitc-2021-003133supp011.pdf]

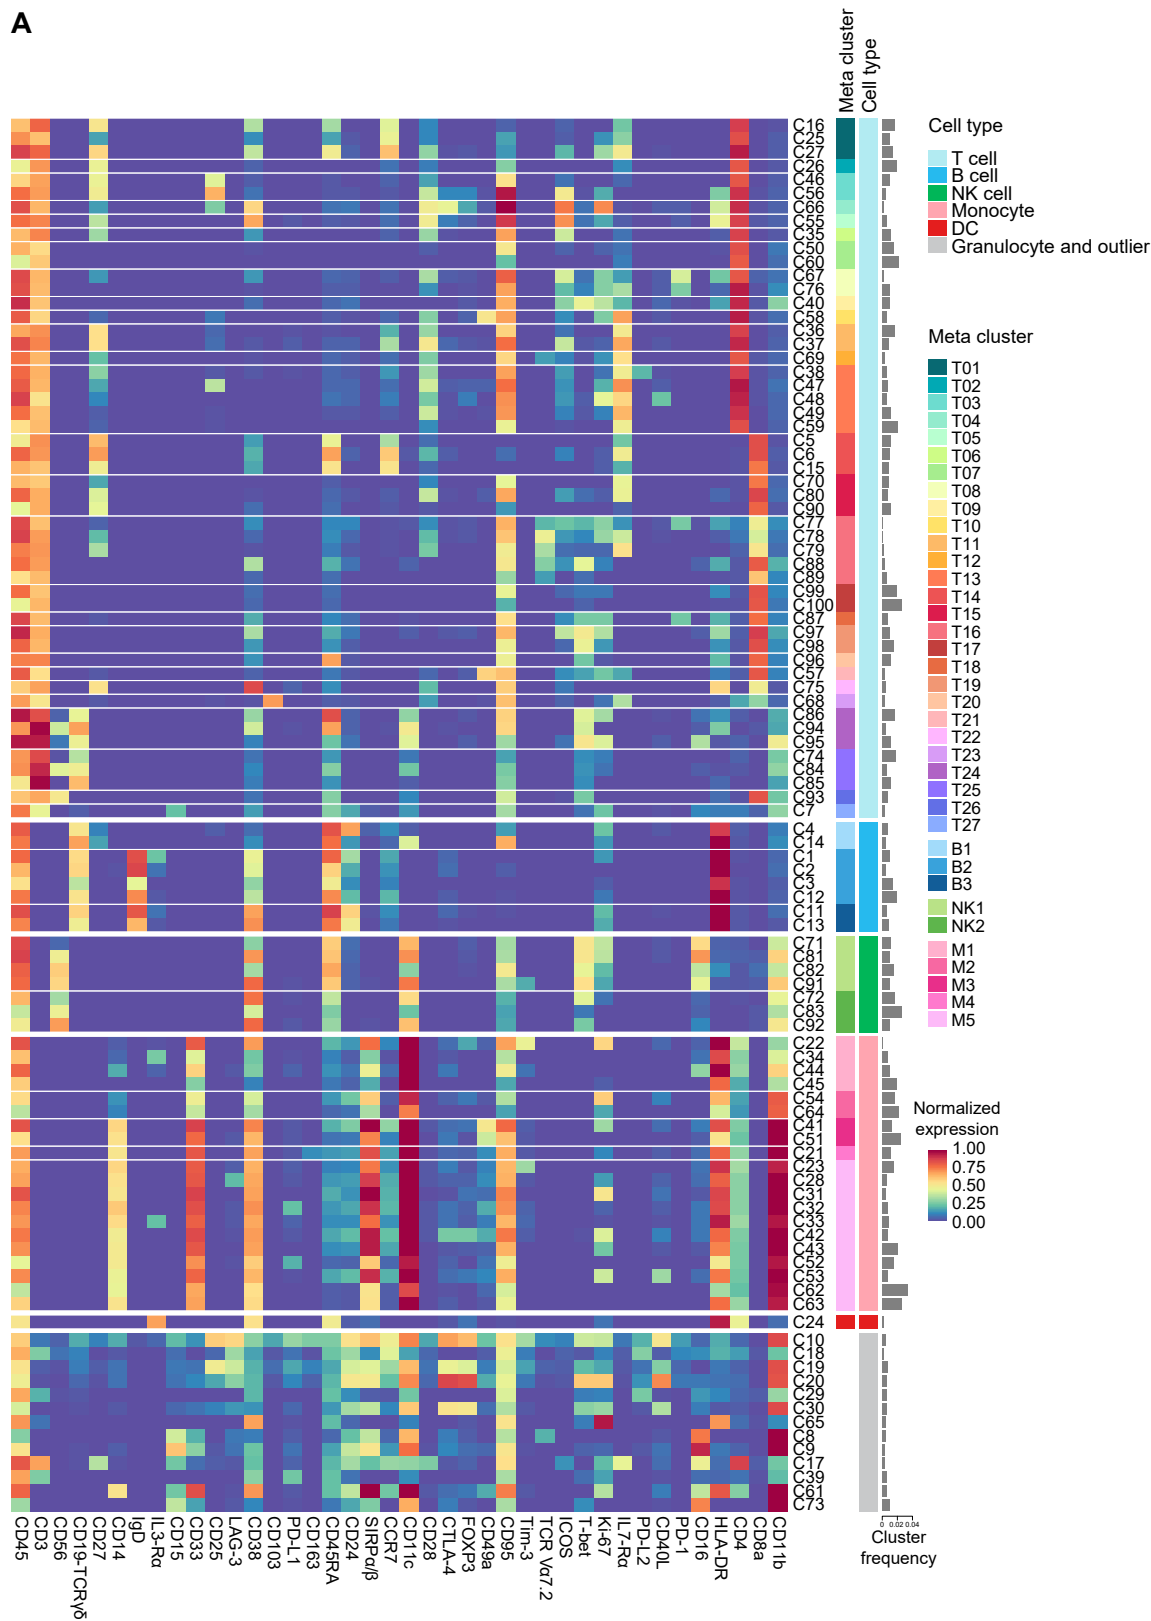

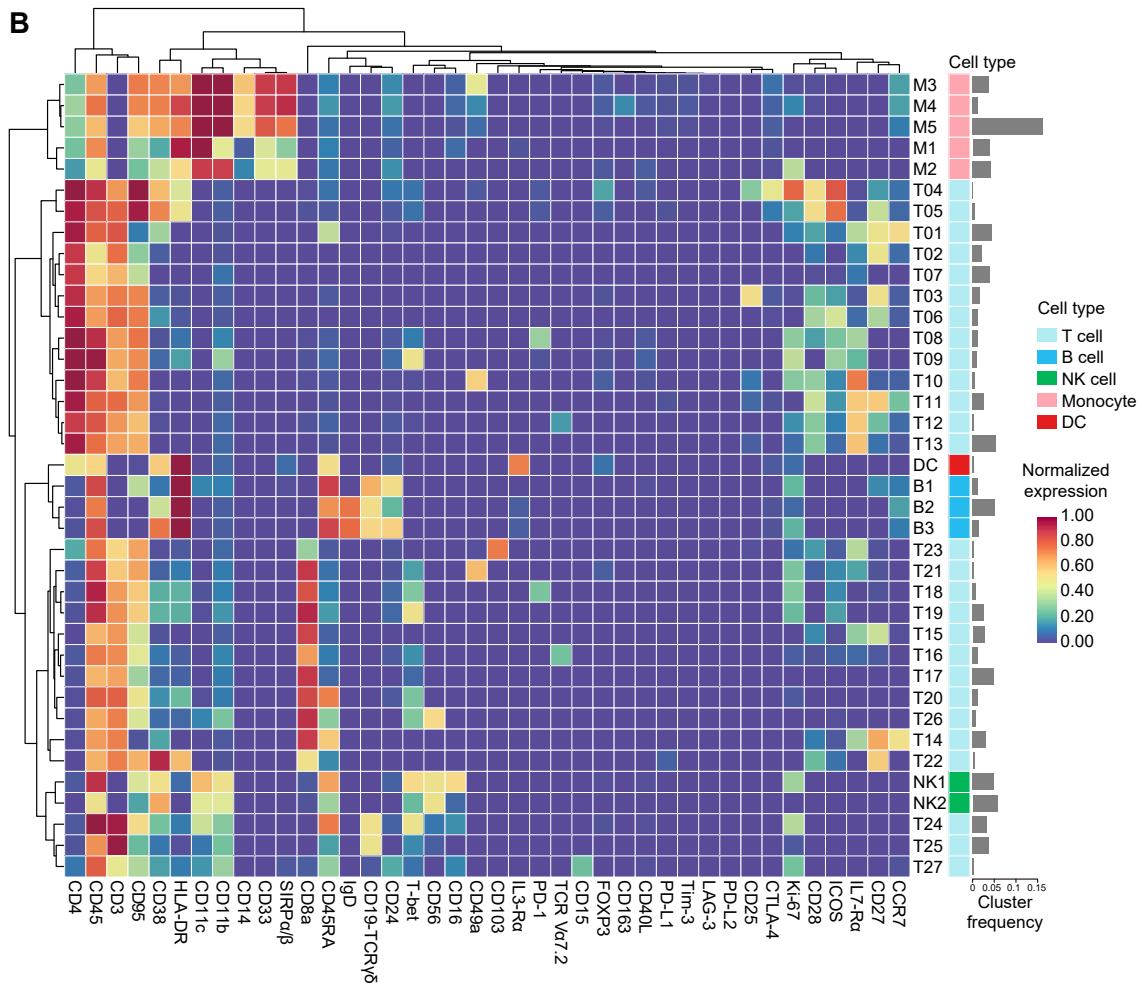

**Supplementary Figure 10. Heatmap of immune subsets in advanced HCC cohort.**

Supplement: jitc-2021-003133supp014.pdf [file jitc-2021-003133supp014.pdf]
